# Supplementary material for: neuromaps: structural and functional interpretation of brain maps
Source: PubMed Central journal article supplement (PMC9636018; doi:10.1038/s41592-022-01625-w), 2022-10-06
Supplement: 41592_2022_1625_MOESM1_ESM.pdf [file 41592_2022_1625_MOESM1_ESM.pdf]

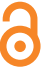

---

# neuromaps: structural and functional interpretation of brain maps

---

In the format provided by the authors and unedited

Table 1. **Published brain maps available in neuromaps**

| <i>Map name</i>                         | <i>Coordinate system</i> | <i>Density</i> | <i>Citation</i>       |
|-----------------------------------------|--------------------------|----------------|-----------------------|
| Myelin map                              | fsLR                     | 32k            | Glasser et al. [30]   |
| Cortical thickness                      | fsLR                     | 32k            | Glasser et al. [30]   |
| Allen Human Brain Atlas PC1             | fsaverage                | 10k            | Markello et al. [28]  |
| Delta power (2–4 Hz)                    | fsLR                     | 4k             | Van Essen et al. [29] |
| Theta power (5–7 Hz)                    | fsLR                     | 4k             | Van Essen et al. [29] |
| Alpha power (8–12 Hz)                   | fsLR                     | 4k             | Van Essen et al. [29] |
| Beta power (15–29 Hz)                   | fsLR                     | 4k             | Van Essen et al. [29] |
| Low gamma power (30–59 Hz)              | fsLR                     | 4k             | Van Essen et al. [29] |
| High gamma power (60–90 Hz)             | fsLR                     | 4k             | Van Essen et al. [29] |
| Intrinsic timescale                     | fsLR                     | 4k             | Van Essen et al. [29] |
| Developmental expansion                 | fsLR                     | 164k           | Hill et al. [19]      |
| Evolutionary expansion                  | fsLR                     | 164k           | Hill et al. [19]      |
| Functional gradient                     | fsLR                     | 32k            | Margulies et al. [32] |
| Inter-subject functional variability    | fsaverage                | 1k             | Mueller et al. [33]   |
| NeuroSynth PC1                          | MNI152                   | 2mm            | Yarkoni et al. [34]   |
| Cerebral blood flow (CBF)               | fsLR                     | 164k           | Vaishnavi et al. [10] |
| Cerebral blood volume (CBV)             | fsLR                     | 164k           | Vaishnavi et al. [10] |
| Oxygen metabolism (CMRO2)               | fsLR                     | 164k           | Vaishnavi et al. [10] |
| Glucose metabolism (GMRGlu)             | fsLR                     | 164k           | Vaishnavi et al. [10] |
| Allometric scaling (PNC)                | CIVET                    | 41k            | Reardon et al. [22]   |
| Allometric scaling (NIH)                | CIVET                    | 41k            | Reardon et al. [22]   |
| Neurotransmitter receptors/transporters | MNI152                   | —              | Hansen et al. [14]    |

Table 2. **Standard coordinate system files available in neuromaps**

| <i>Coordinate system</i> | <i>Density / resolution</i> | <i>Provided files</i>                                |
|--------------------------|-----------------------------|------------------------------------------------------|
| fsLR                     | 4k                          | midthickness, inflated, sphere                       |
| fsLR                     | 8k                          | midthickness, inflated, sphere                       |
| fsLR                     | 32k                         | midthickness, inflated, very inflated, sphere        |
| fsLR                     | 164k                        | midthickness, inflated, very inflated, sphere        |
| fsaverage                | 3k                          | white, pial, inflated, sphere                        |
| fsaverage                | 10k                         | white, pial, inflated, sphere                        |
| fsaverage                | 41k                         | white, pial, inflated, sphere                        |
| fsaverage                | 164k                        | white, pial, inflated, sphere                        |
| CIVET                    | 41k                         | white, midthickness, inflated, very inflated, sphere |
| MNI152                   | 1mm                         | T1w, T2w, PD, brainmask                              |
| MNI152                   | 2mm                         | T1w, T2w, PD, brainmask                              |
| MNI152                   | 3mm                         | T1w, T2w, PD, brainmask                              |
